# Supplementary material
Source: PubMed Central journal article supplement (PMC1829282)

$MI_{\min} = 0.8$  bits

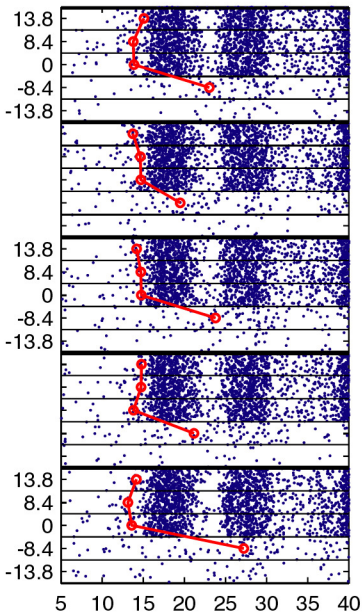

$MI_{\min} = 0.17$  bits

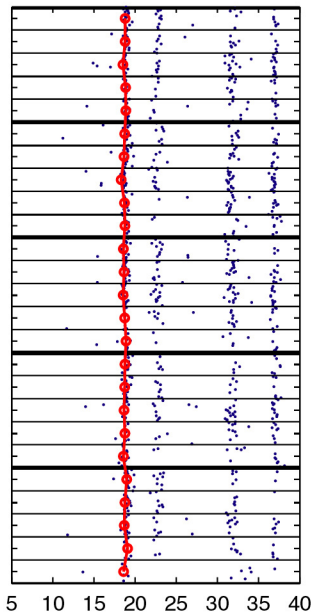

$MI_{\min} = 0.75$  bits

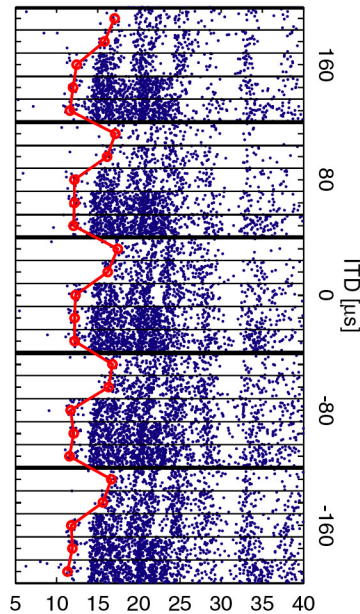

$MI_{\min} = 1.11$  bits

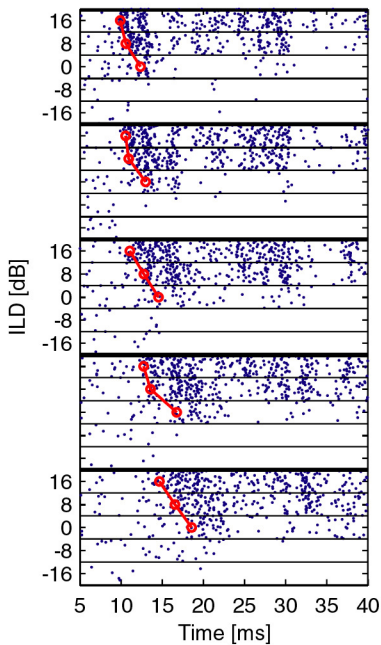

$MI_{\min} = 0.46$  bits

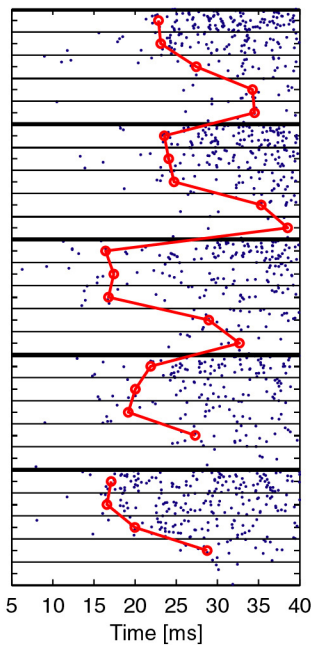

$MI_{\min} = 1.25$  bits

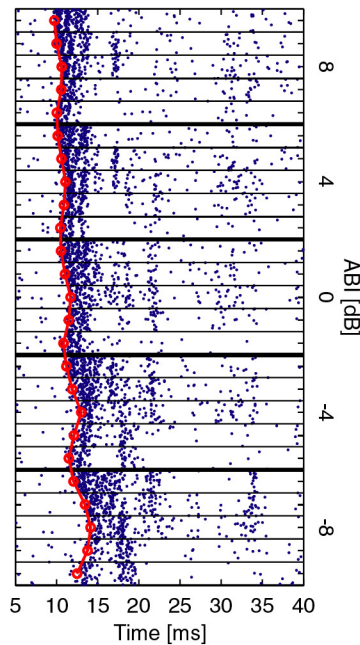

Supplement: pnas_0610368104_1.pdf [file pnas_0610368104_1.pdf]

**A.**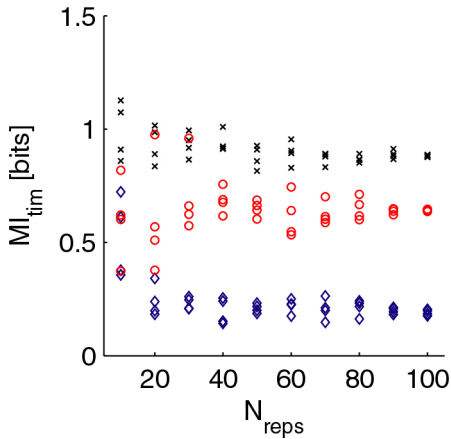**B.**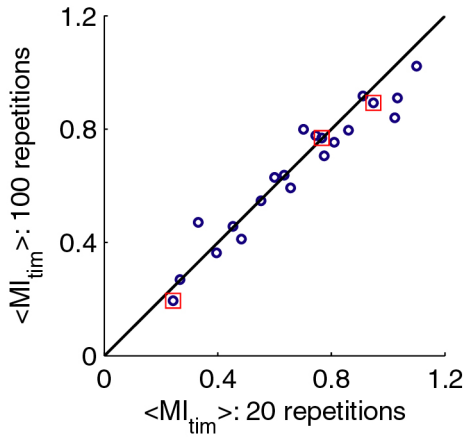

Supplement: pnas_0610368104_2.pdf [file pnas_0610368104_2.pdf]
